# Supplementary material for: One-pot synthesis of a PtCu alloy catalyst for the methanol oxidation reaction
Source: Royal Society of Chemistry journal article supplement (doi:10.1039/d2nj03864a), 2022-01-01
Supplement: d2nj03864a1.pdf [file d2nj03864a1.pdf]

## One-pot synthesis of PtCu alloy catalyst for methanol oxidation reaction

Lianjie Li<sup>ab</sup>, Yican Zhao<sup>ab</sup>, Zuotao Lei<sup>\*ab</sup>, and Chunhui Yang<sup>\*ab</sup>

a MIIT Key Laboratory of Critical Materials Technology for New Energy Conversion and Storage, School of Chemistry and Chemical Engineering, Harbin Institute of Technology, Harbin, 150001, People's Republic of China

b State Key Laboratory of Urban Water Resource and Environment, Harbin Institute of Technology, Harbin, 150001, People's Republic of China

\* Corresponding author: leizuotao@hit.edu.cn; yangchh@hit.edu.cn

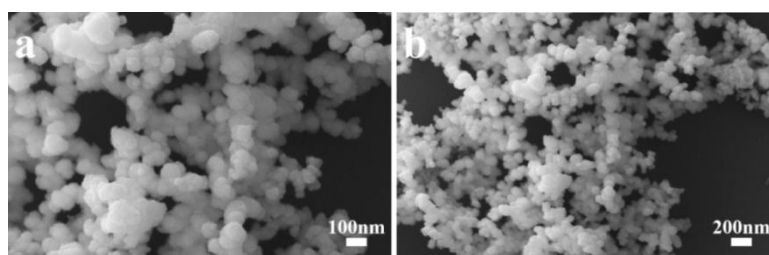

Fig. S1. SEM images of PtCu NPs.

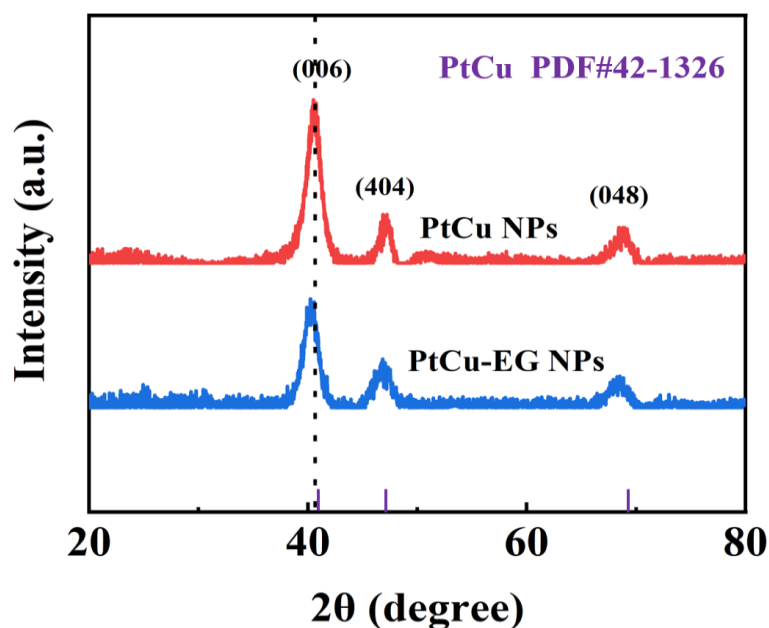

Fig. S2. The XRD patterns of PtCu and PtCu-EG catalysts.

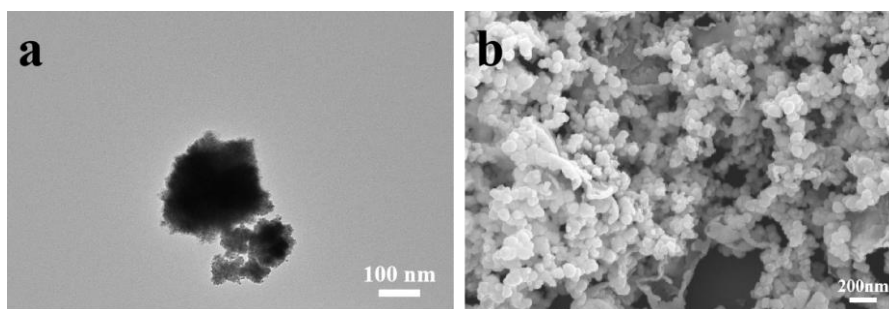

Fig. S3. Morphology characterization diagram. (a) TEM image of PtCu-EG NPs. (b) SEM image of without CTAB.

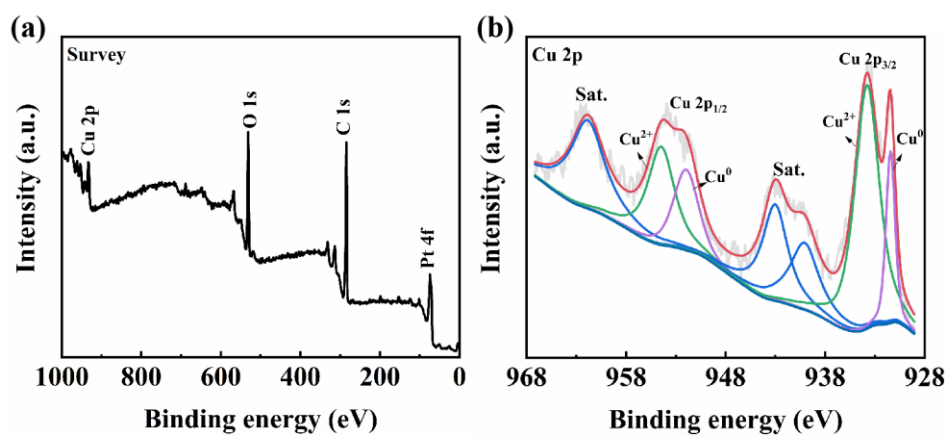

Fig. S4. The XPS spectra of PtCu NPs. (a) survey scan and (b) Cu 2p.

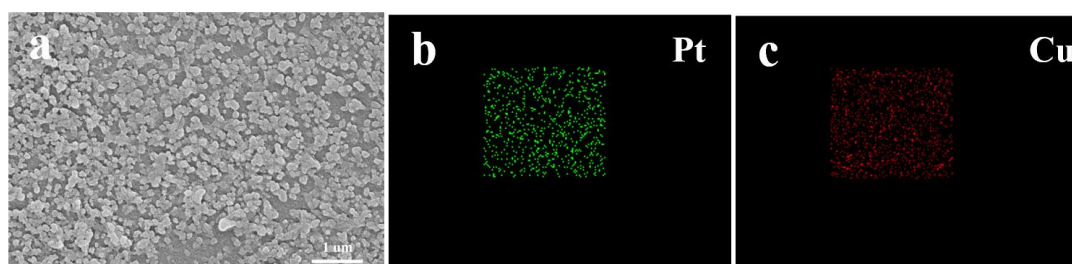

Fig. S5. The PtCu NPs catalysts after CA. (a) SEM. (b, c) EDS

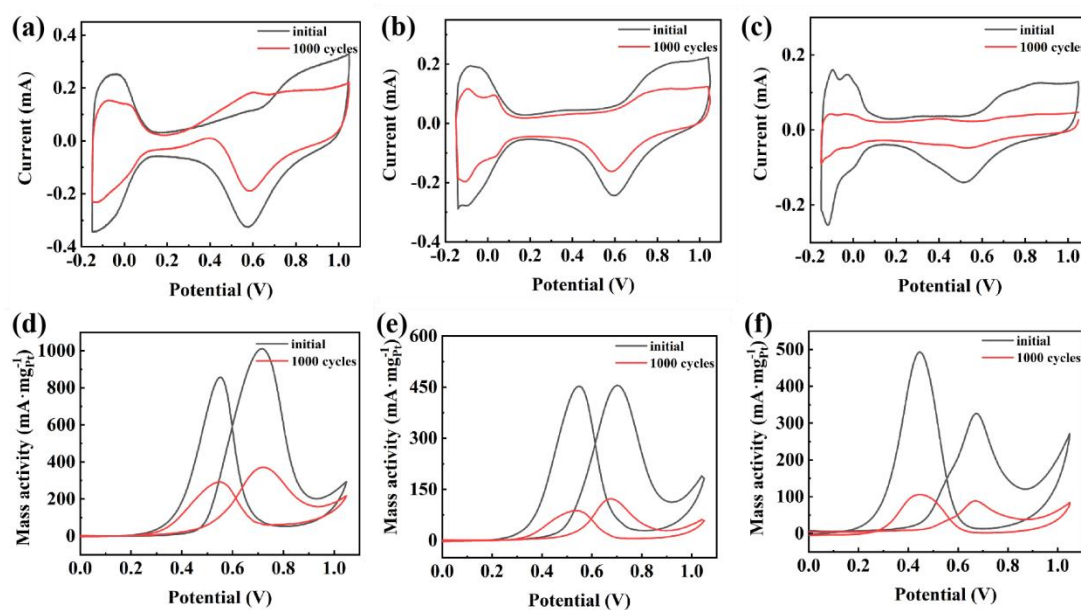

Fig. S6. Performance comparison of PtCu NPs, PtCu-EG NPs and commercial Pt/C catalysts after 1000 cycles of MOR. (a, b, c) activation curves of PtCu, PtCu-EG and commercial Pt/C before and after 1000 cycles and (d, e, f) MOR curves of PtCu, PtCu-EG and commercial Pt/C before and after 1000 cycles.

| Catalysts   | Mass ratio (Pt: Cu) |
|-------------|---------------------|
| PtCu NPs    | 3.19: 1.65          |
| PtCu-EG NPs | 33.35: 4.334        |

Table S1. The compositions of PtCu NPs and PtCu-EG NPs catalysts determined by ICP-OES.
